# Supplementary material for: Supramolecular structures of uracil-functionalized PEG with multi-diamidopyridine POSS through complementary hydrogen bonding interactions
Source: Royal Society of Chemistry journal article supplement (doi:10.1039/c3sm27968e), 2013-01-01
Supplement: c3sm27968e.pdf [file c3sm27968e.pdf]

## Supporting Information

# Supramolecular Structures of Uracil-Functionalized PEG with Multi-Diamidopyridine POSS through Complementary Hydrogen Bonding Interactions

Jui-Hsu Wang,<sup>a</sup> Oleksii Altukhov,<sup>b</sup> Chih-Chia Cheng,<sup>a</sup> Feng-Chih Chang,<sup>a,b,\*</sup> and Shiao-Wei Kuo<sup>b,\*</sup>

<sup>a</sup>Institute of Applied Chemistry, National Chiao Tung University, 30010 Hsinchu, Taiwan

<sup>b</sup>Department of Materials and Optoelectronic Science, National Sun Yat-Sen University, 804  
Kaohsiung, Taiwan

\*To whom correspondence should be addressed

E-mail: [kuosw@faculty.nsysu.edu.tw](mailto:kuosw@faculty.nsysu.edu.tw) and [changfc@mail.nctu.edu.tw](mailto:changfc@mail.nctu.edu.tw)

TEL/FAX:886-7-5254099

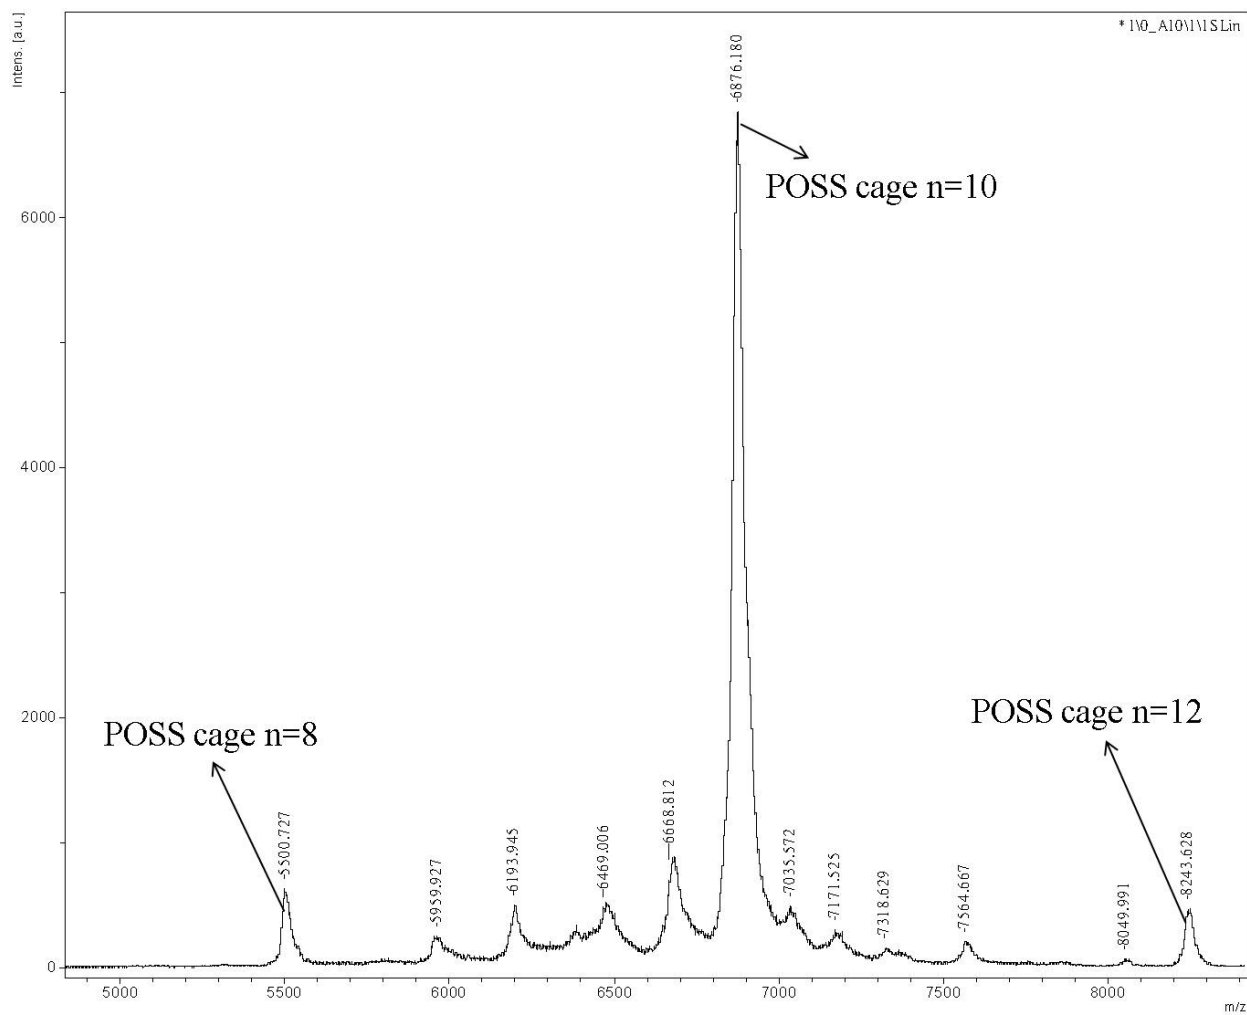

**Figure S1.** MALDI-TOF mass spectra of MD-POSS

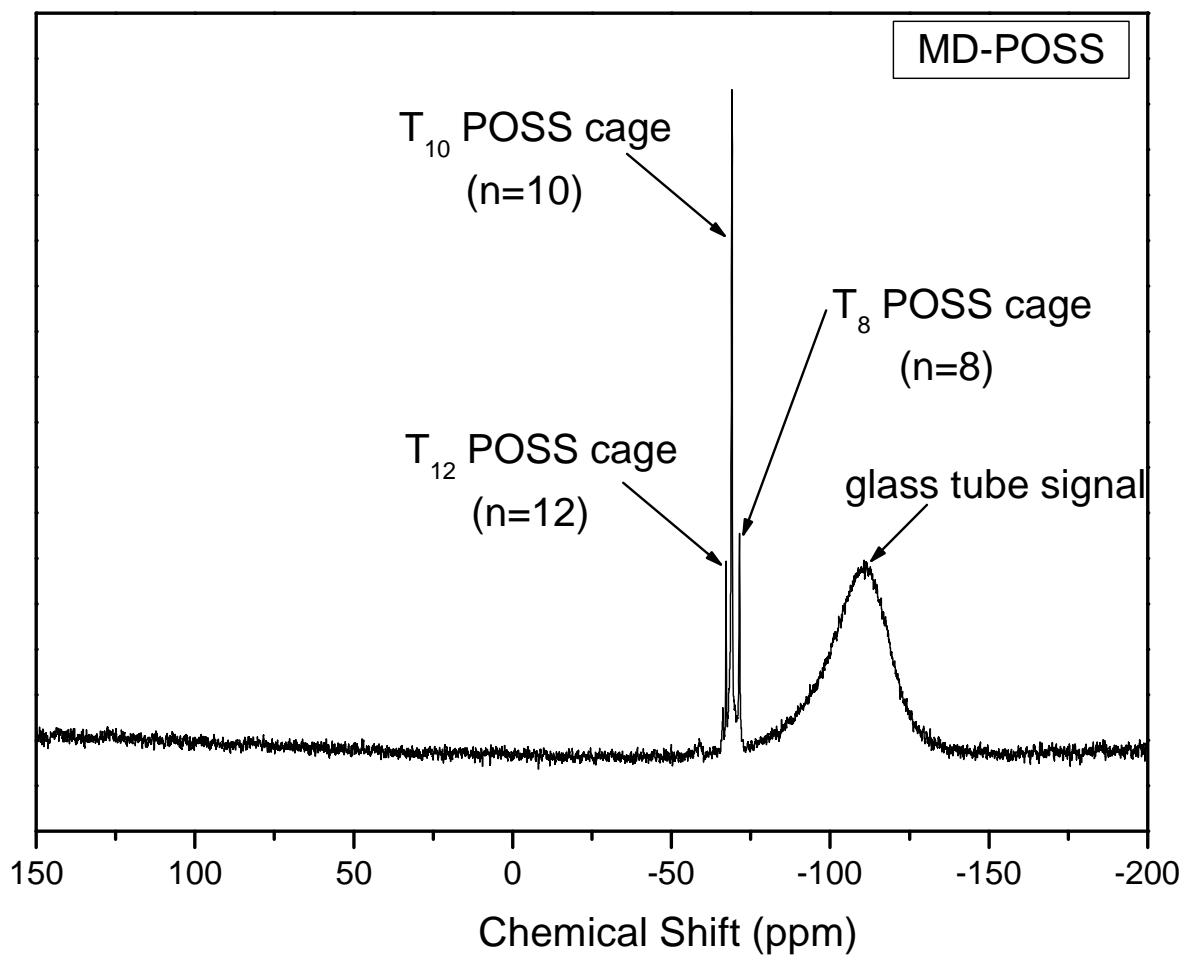

**Figure S2.**  $^{29}\text{Si}$  NMR of MD-POSS

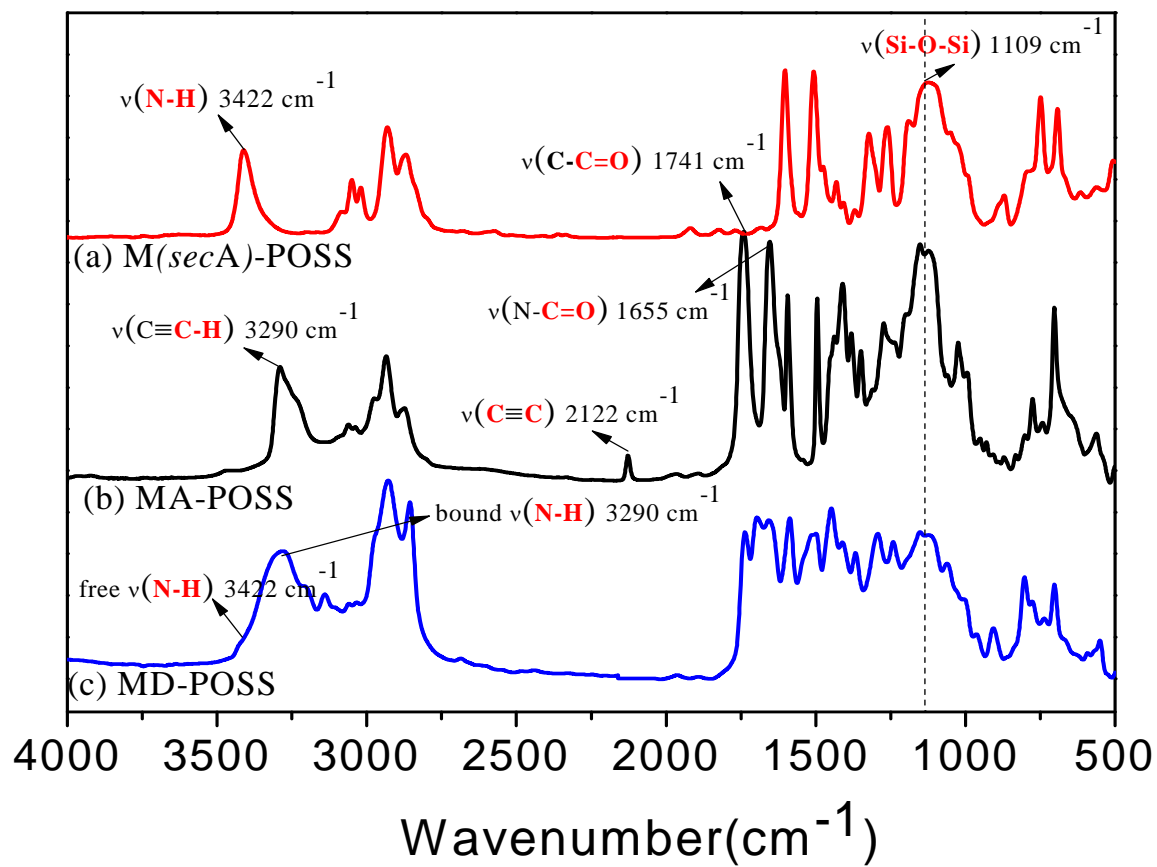

**Figure S3.** FT-IR spectra of (a) M(*secA*)-POSS (b) MA-POSS (c) MD-POSS

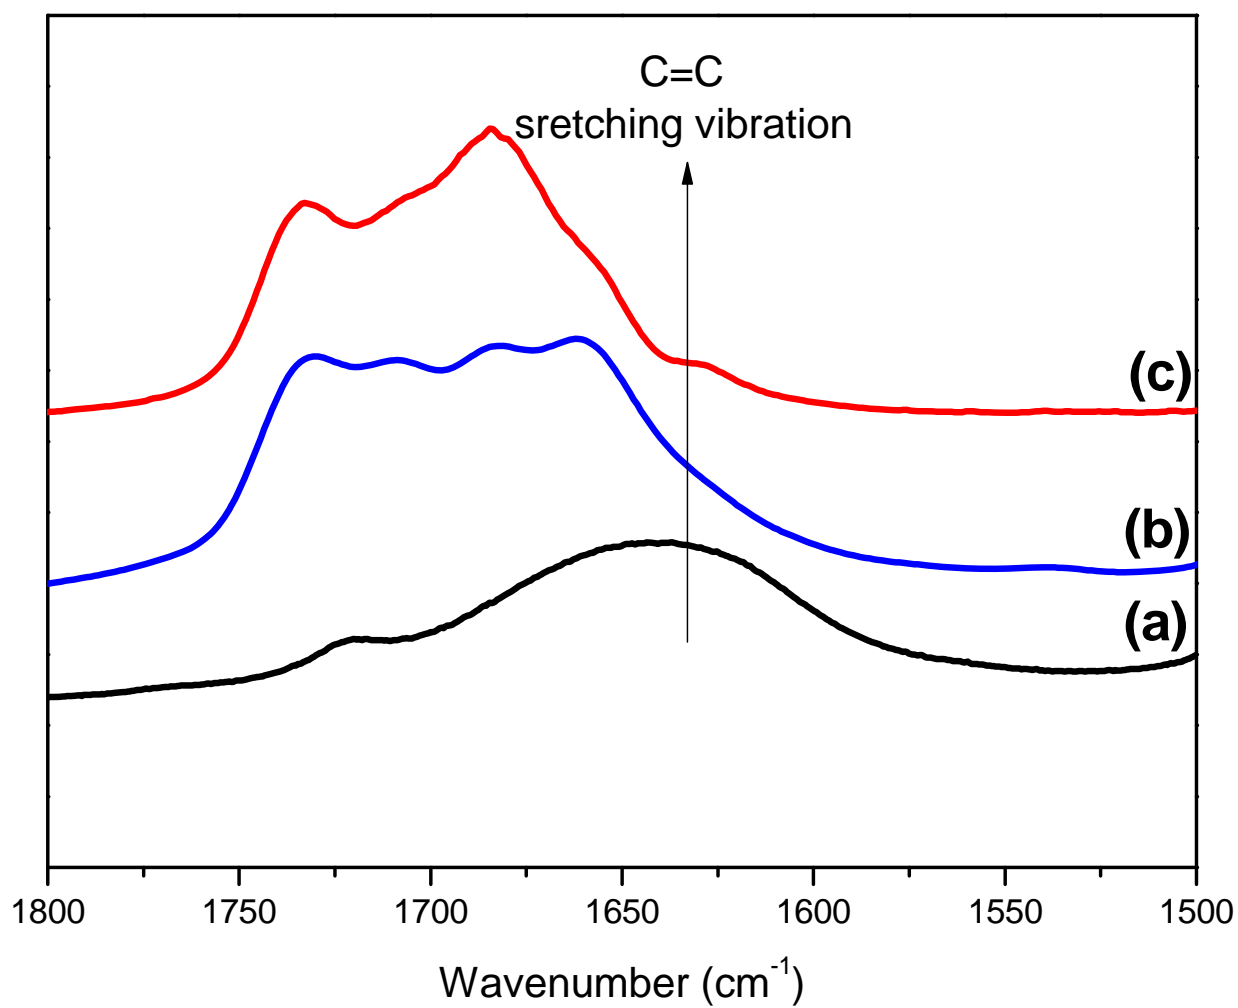

**Figure S4.** FT-IR spectra of (a) acrylate- PEG, (b) U-PEG and (c) U-PEG-U

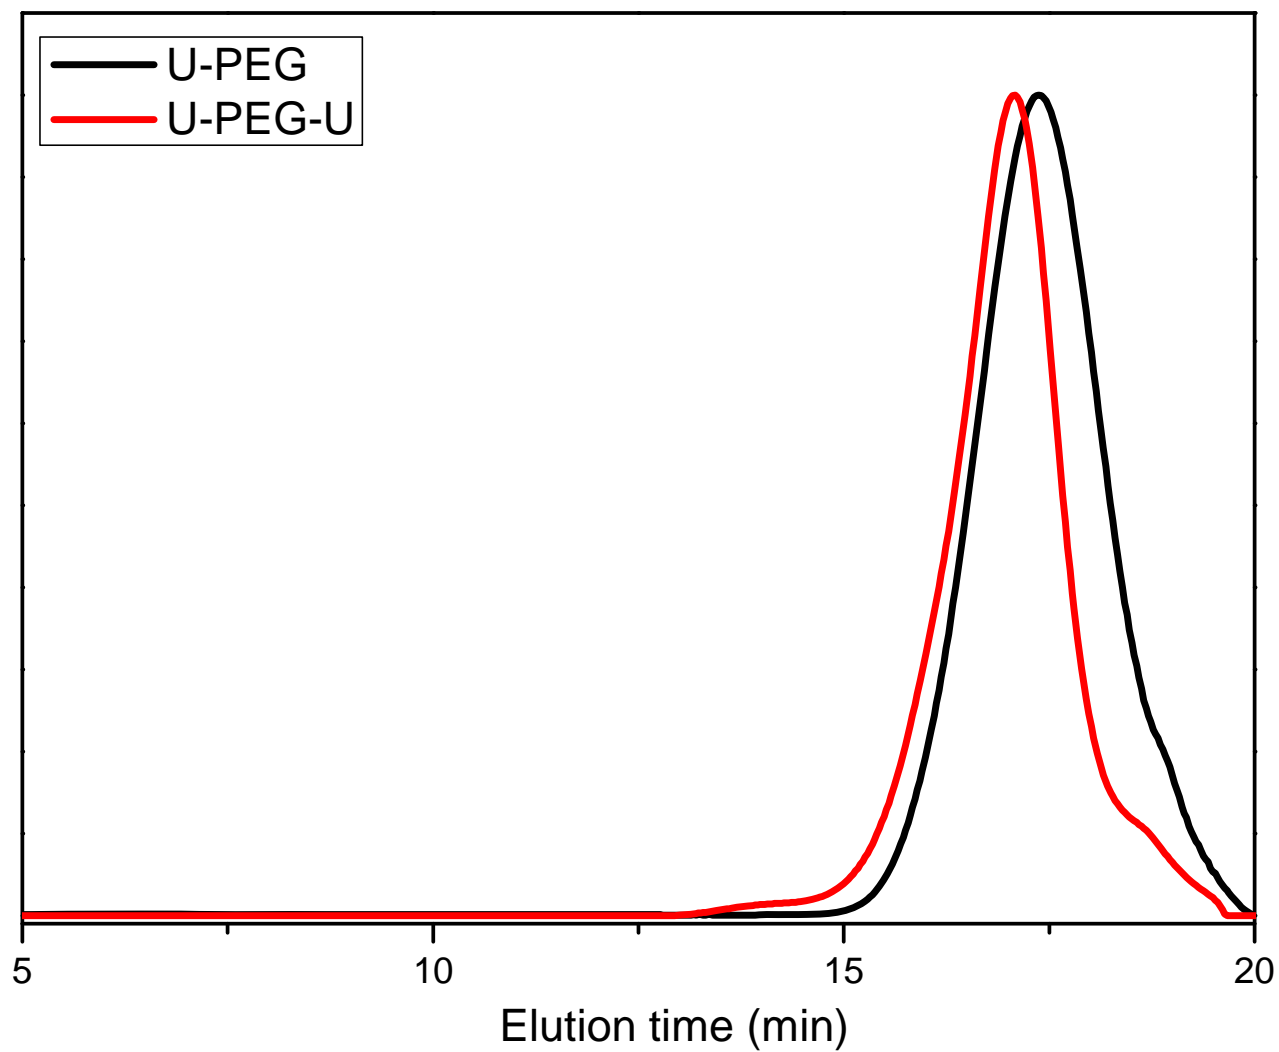

**Figure S5.** GPC analyses of U-PEG and U-PEG-U

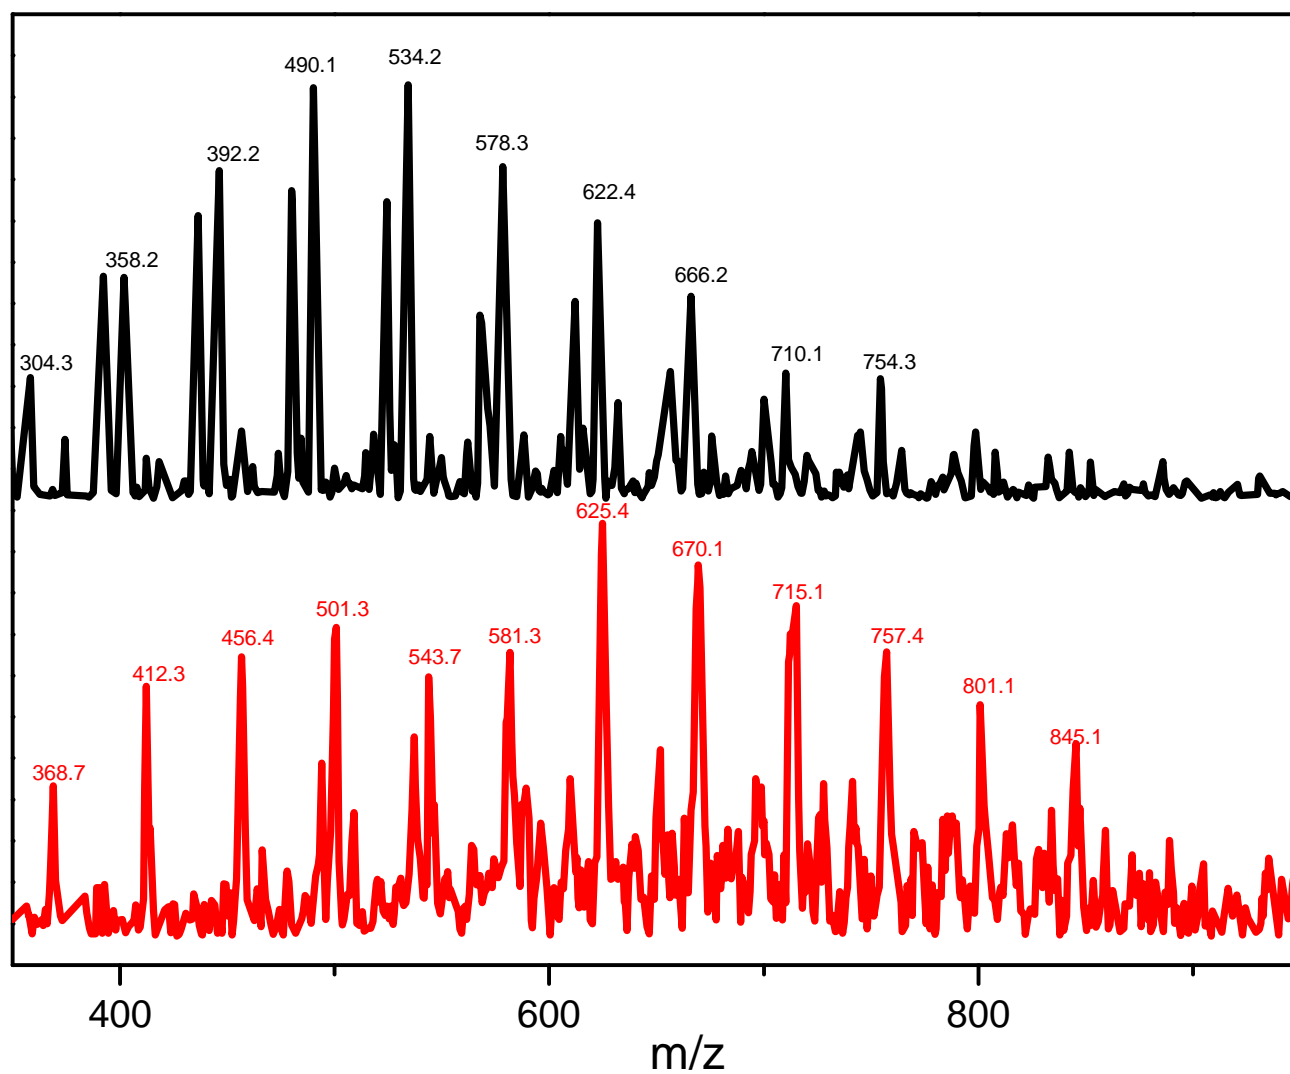

**Figure S6.** EI-MS analyses of U-PEG and U-PEG-U

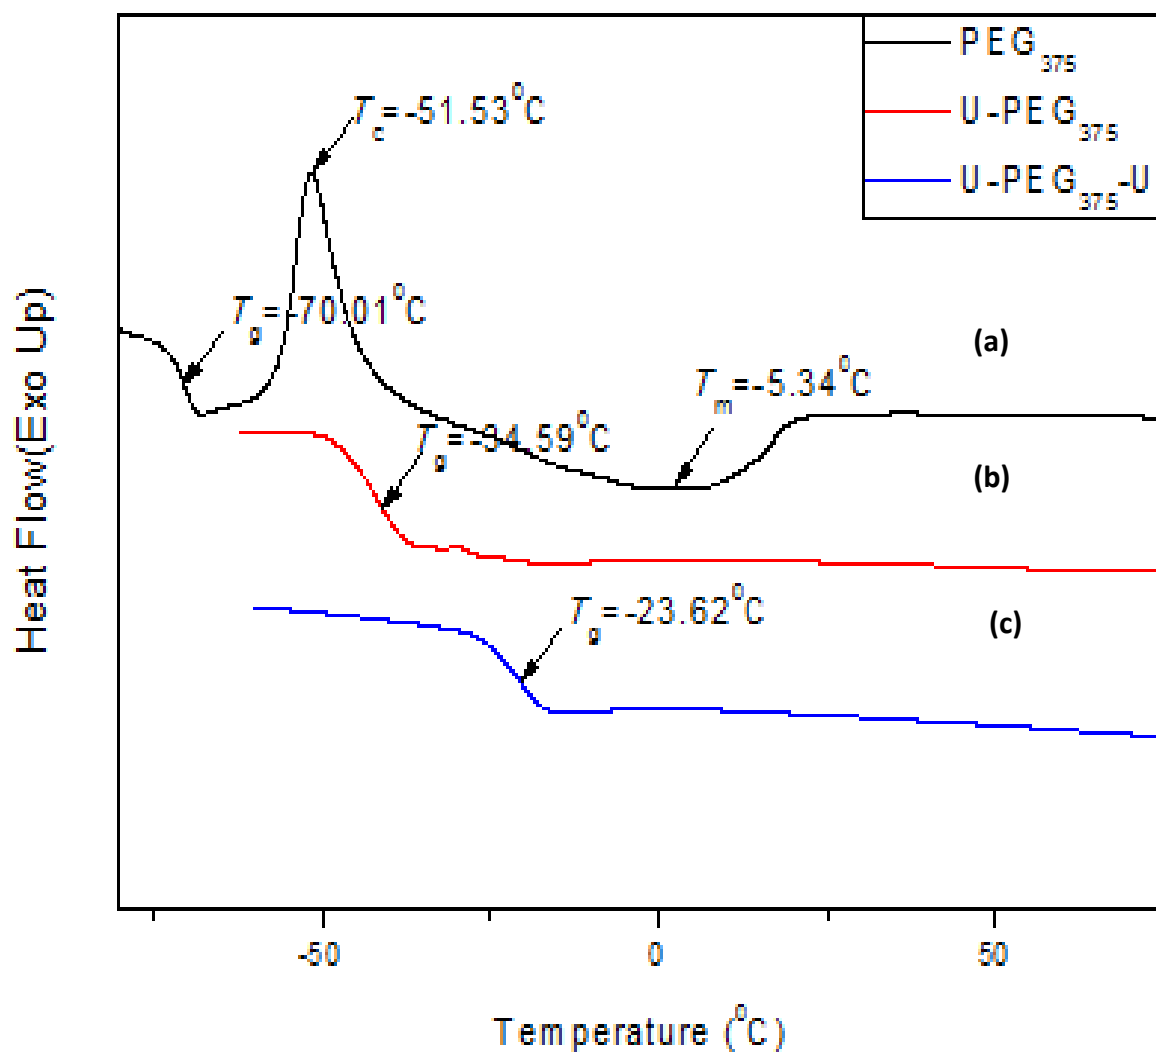

**Figure S7.** DSC plots of (a) acrylate-PEG (b) U-PEG (c) U-PEG-U



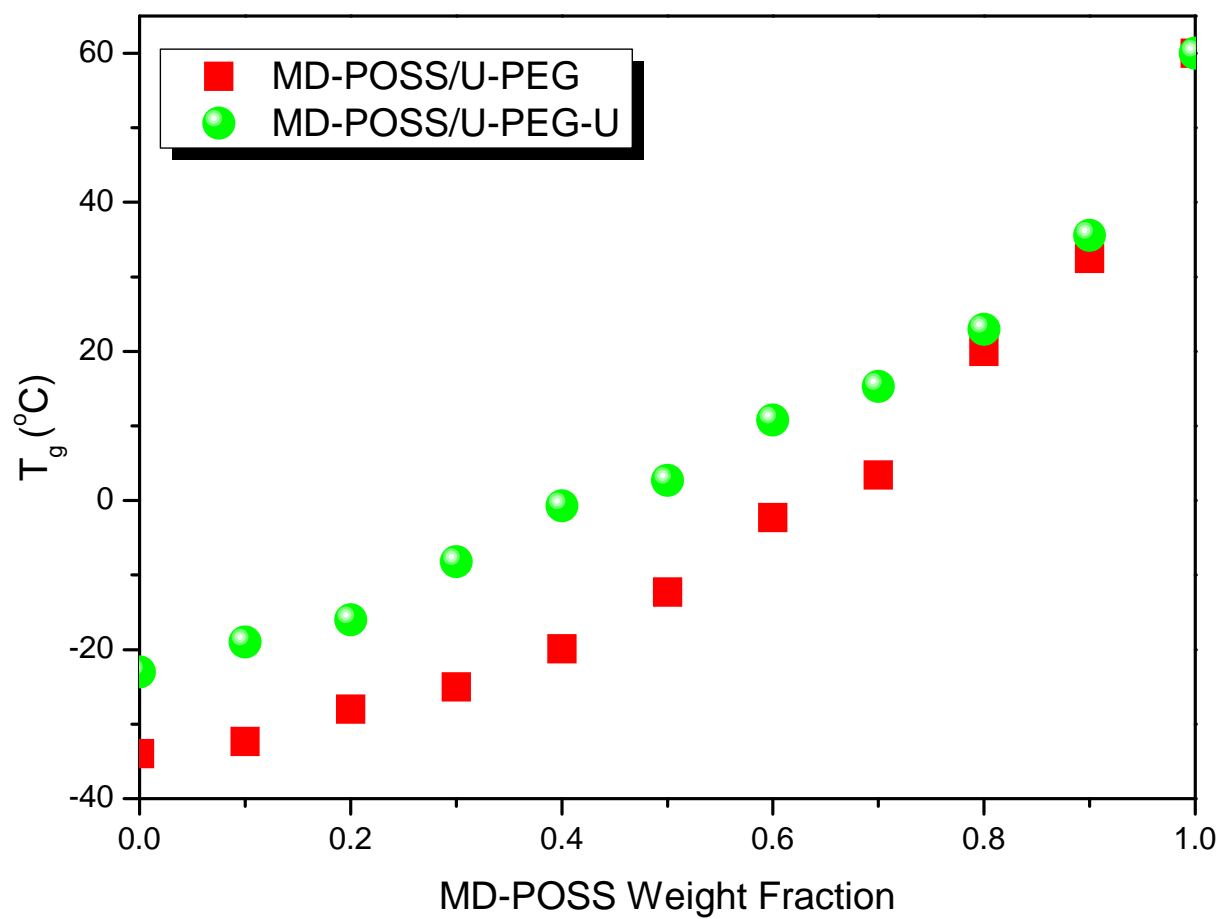

**Figure S8:** T<sub>g</sub> behavior of MD-POSS/U-PEG and MD-POSS/U-PEG-U

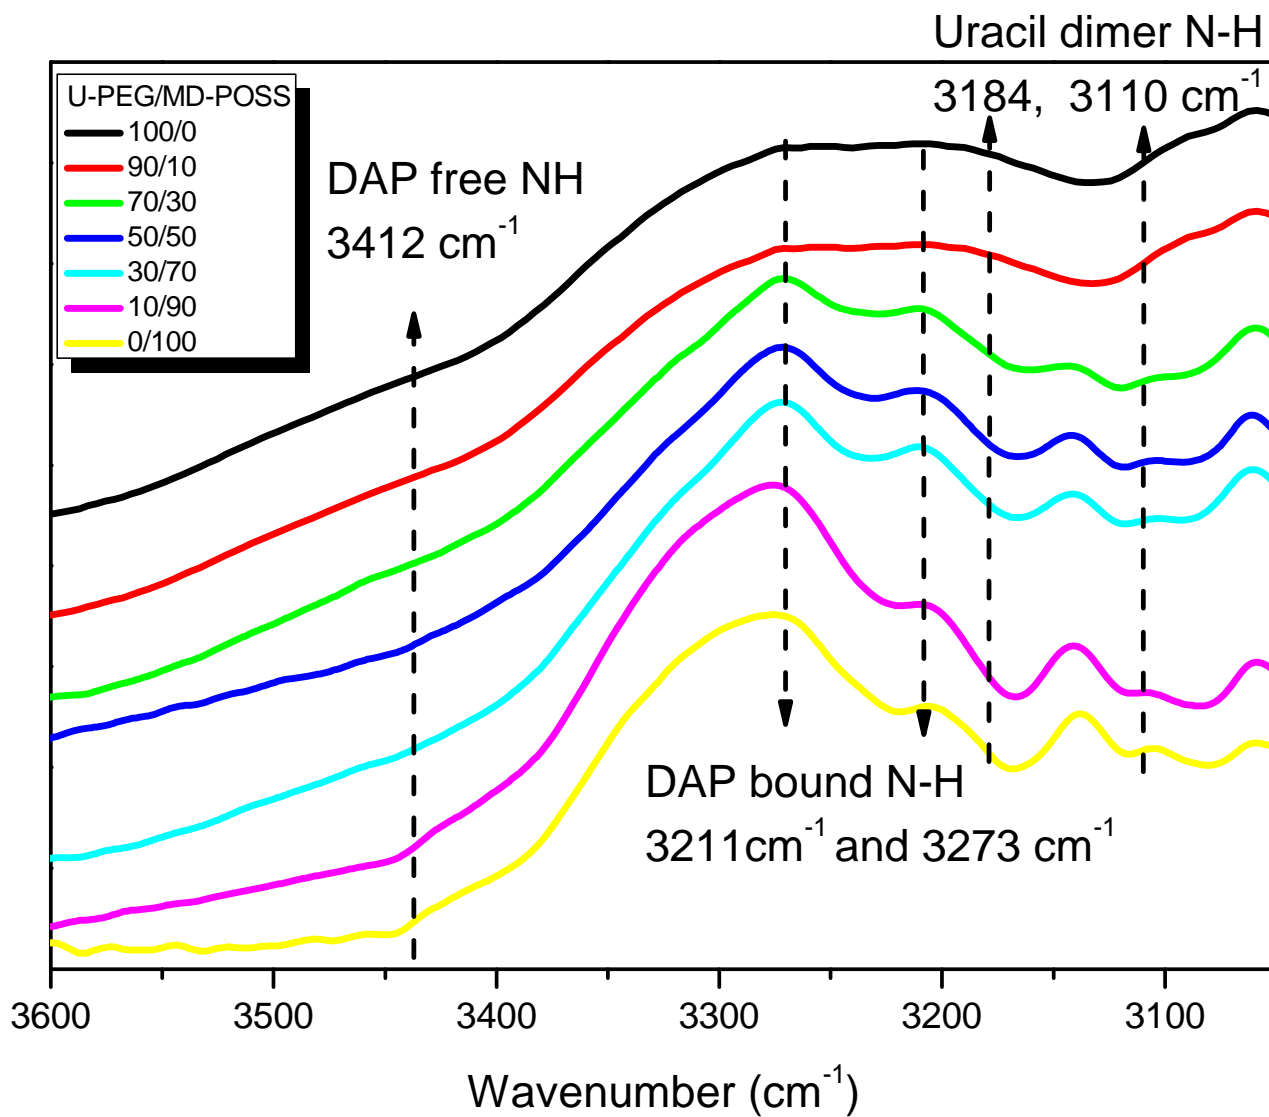

**Figure S9.** FT-IR of 3100-3500(cm<sup>-1</sup>) range for U-PEG/MD-POSS blended system

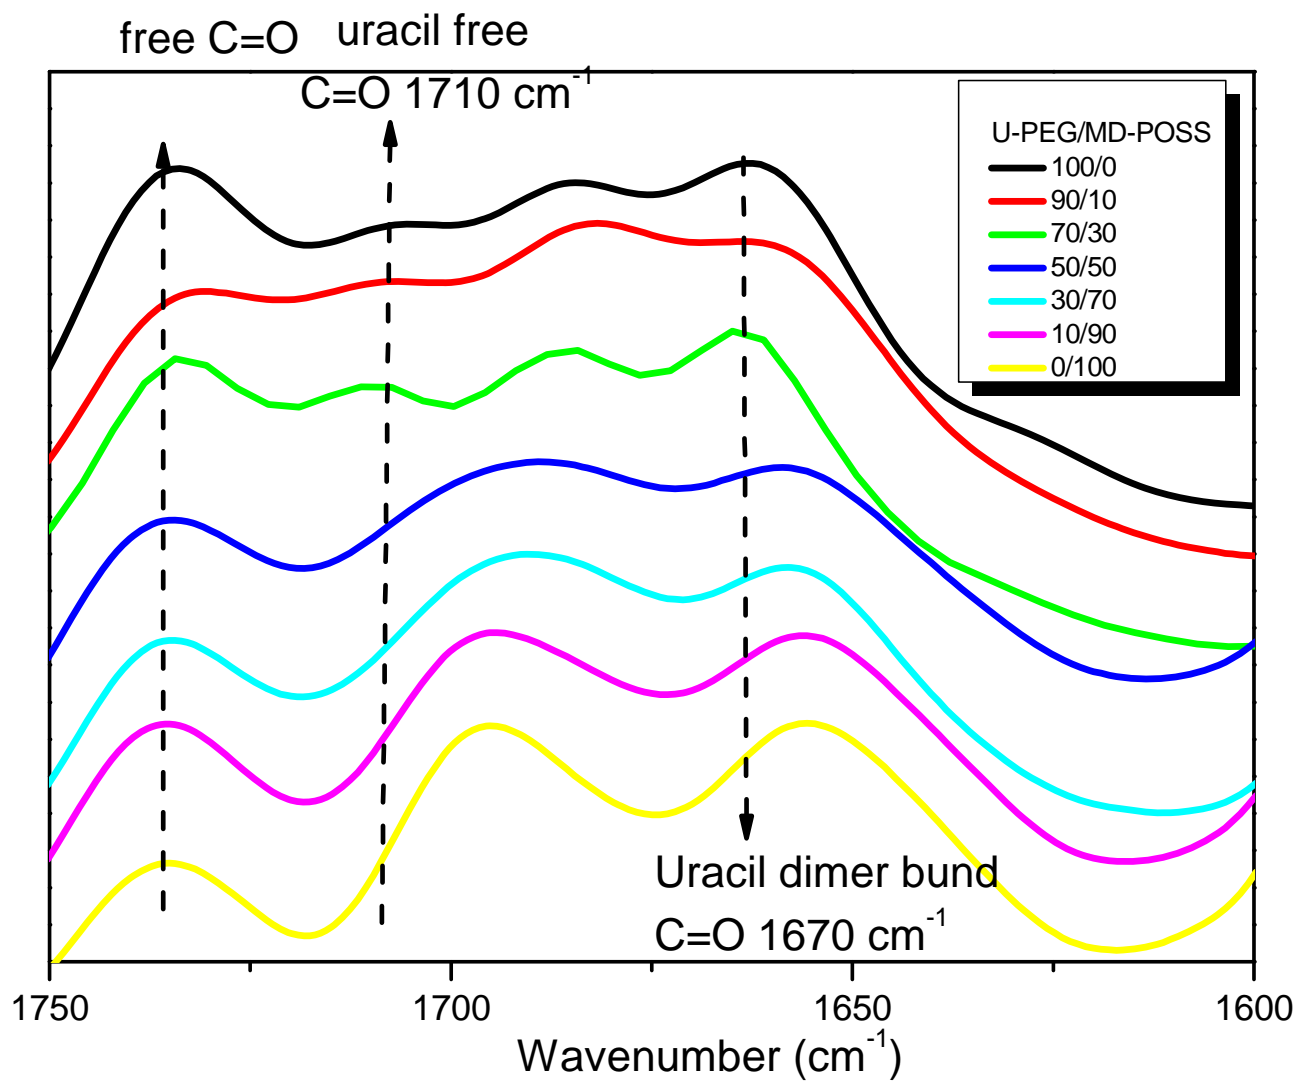

**Figure S710** FT-IR of 1600-1750( $\text{cm}^{-1}$ ) range for U-PEG/MD-POSS blended system

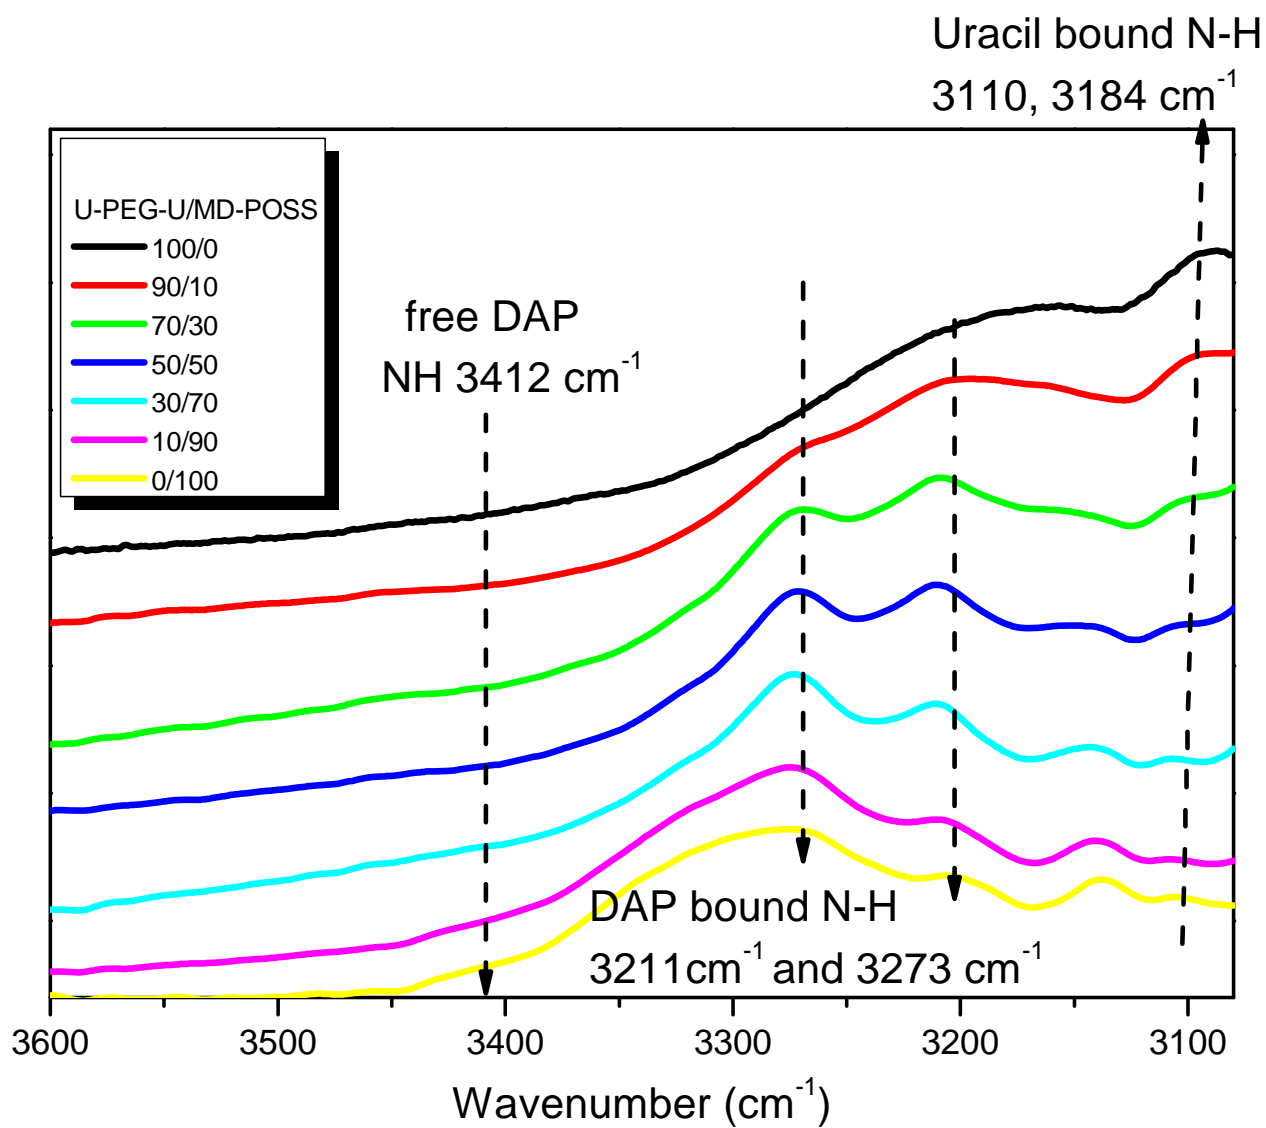

**Figure S11.** FT-IR of 3100-3500( $\text{cm}^{-1}$ ) range for U-PEG-U/MD-POSS blended system

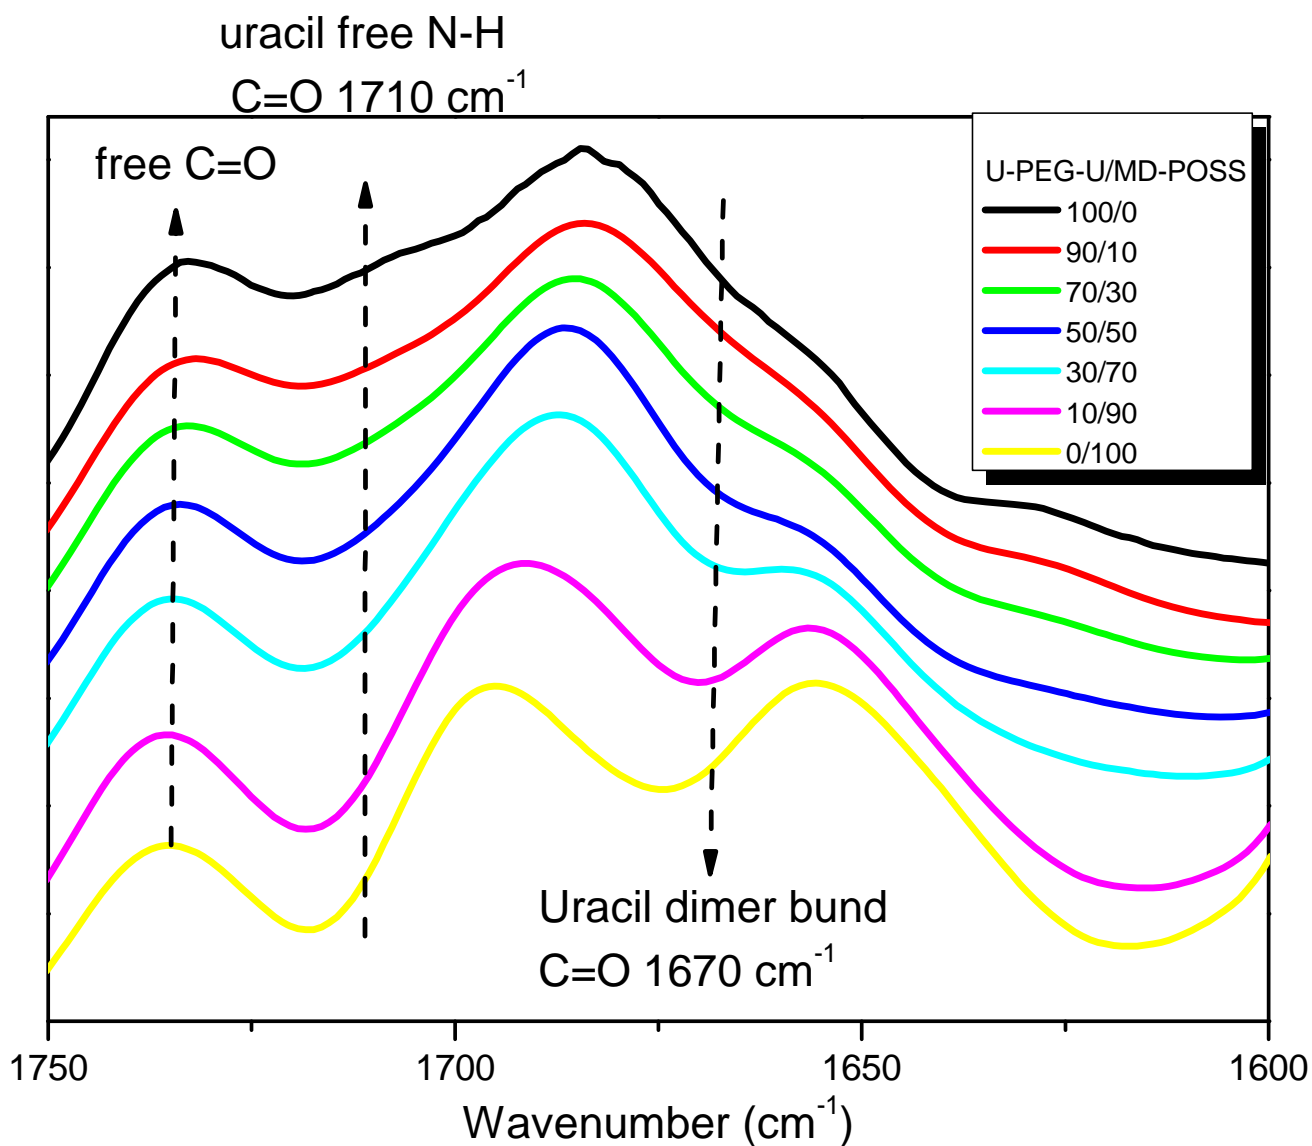

**Figure S12.** FT-IR of 1600-1750(cm<sup>-1</sup>) range for U-PEG-U/MD-POSS blended system

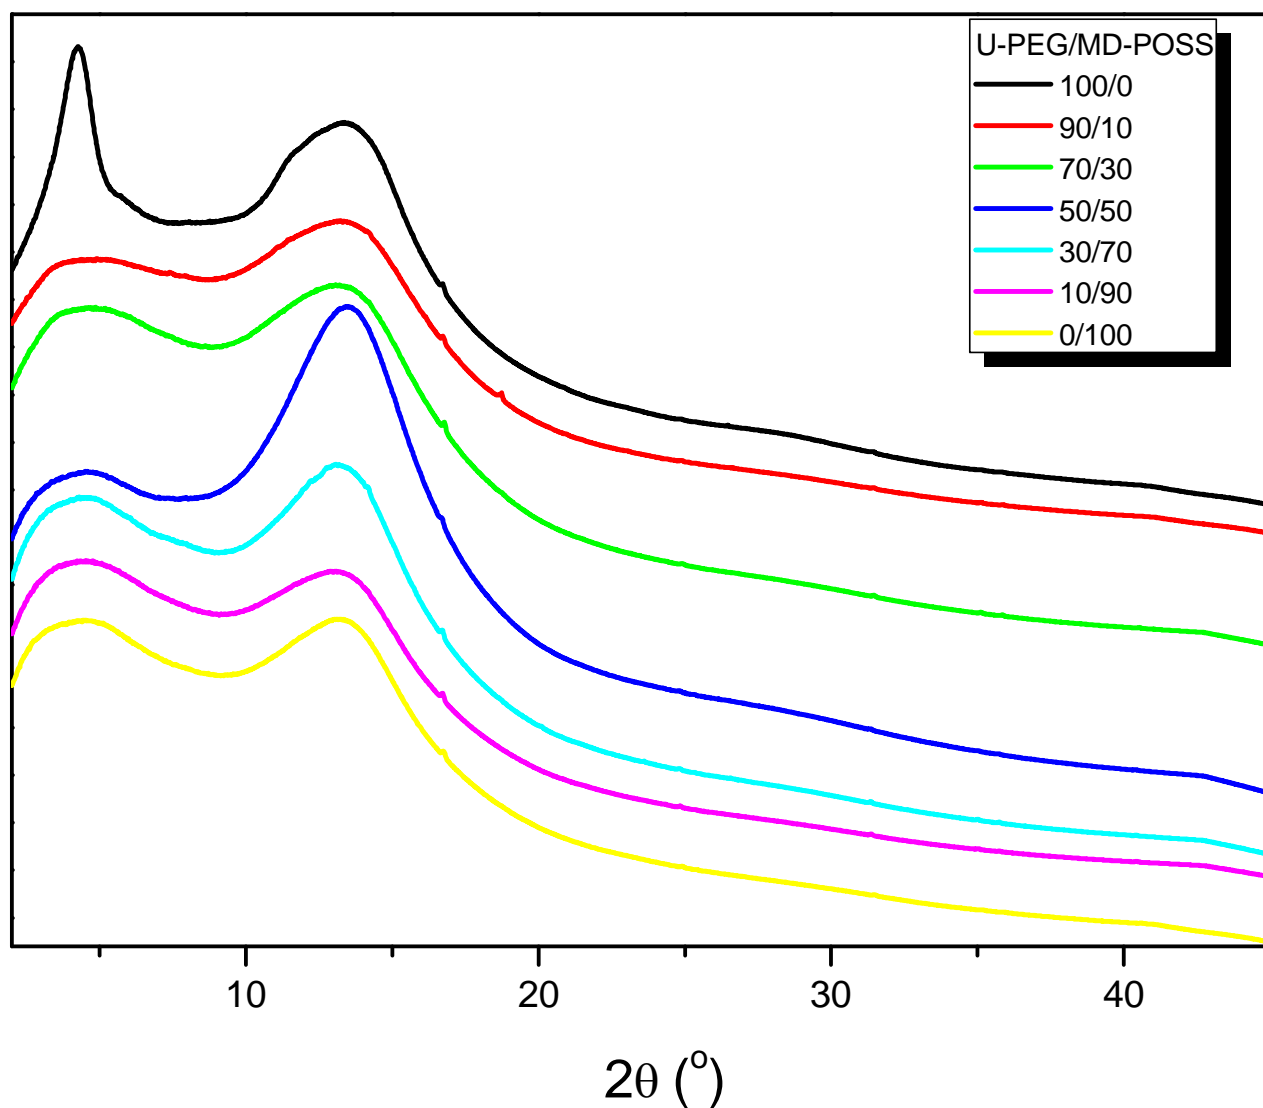

**Figure S13.** WAXD of U-PEG/MD-POSS blended systems

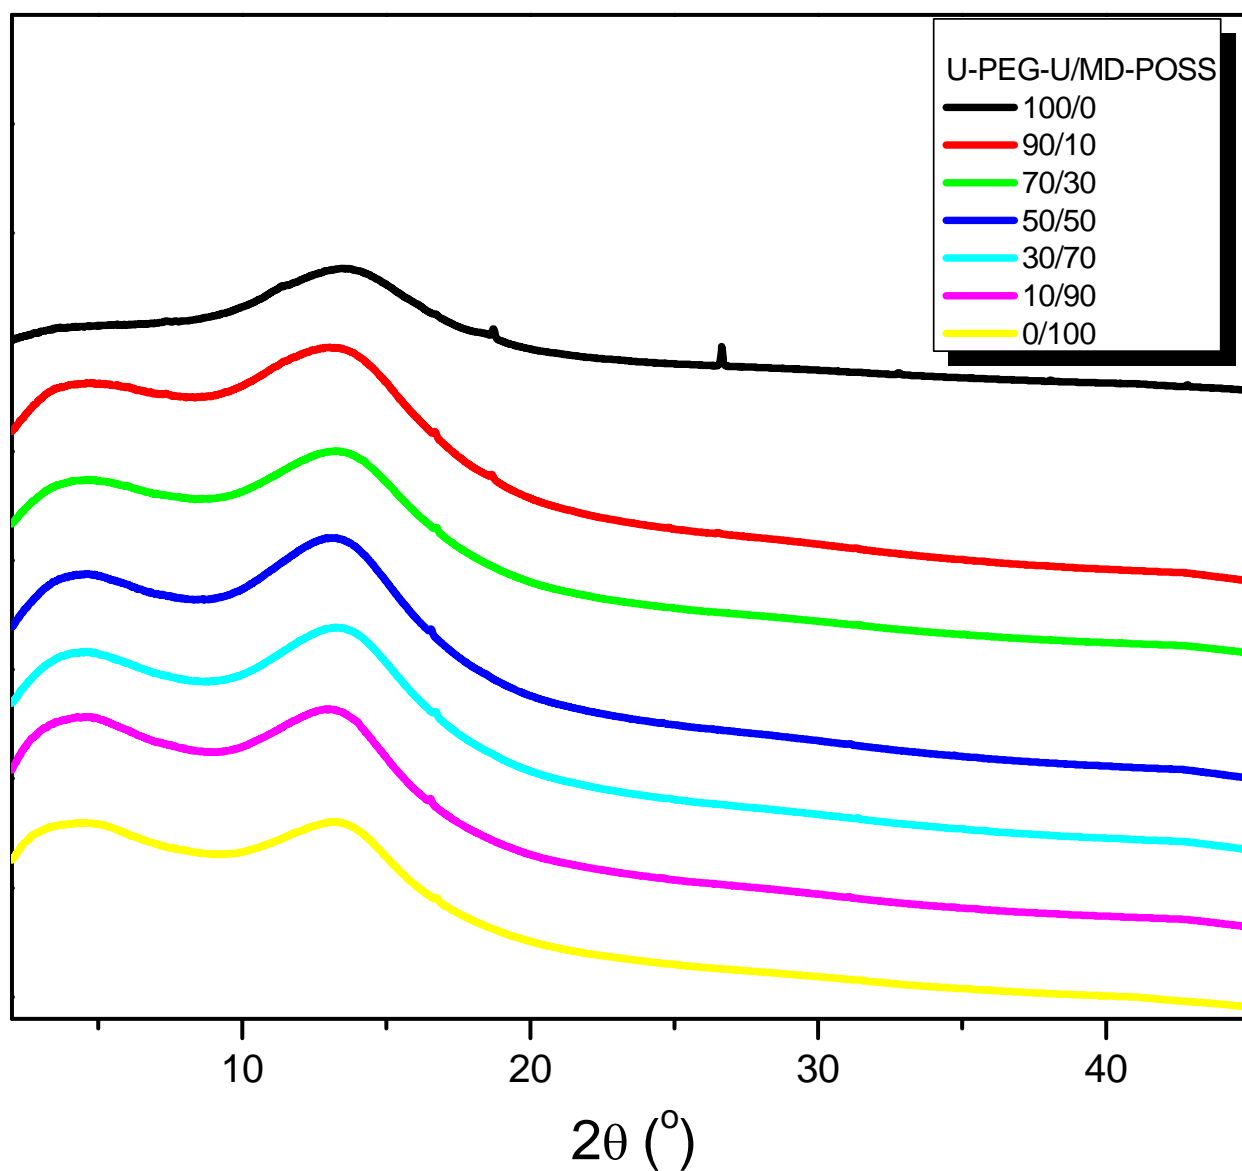

**Figure S14.** WAXD of U-PEG-U/MD-POSS blended system
